# Supplementary material for: A novel inorganic–organic hybrid for detection of nitrite anions with extremely high sensitivity and selectivity
Source: Royal Society of Chemistry journal article supplement (doi:10.1039/c2jm32830e), 2012-01-01
Supplement: c2jm32830e.pdf [file c2jm32830e.pdf]

## Supporting Information

# A Novel Inorganic–Organic Hybrid for Detection of Nitrite anion with Extremely High Sensitivity and Selectivity

Guan-E Wang,<sup>a,b</sup> Gang Xu,<sup>a</sup> Ming-Sheng Wang,<sup>a</sup> Jing Sun,<sup>a</sup> Zhong-Ning Xu,<sup>a</sup> Guo-Cong Guo<sup>\*a</sup> and Jin-Shun Huang<sup>a</sup>

<sup>a</sup> State Key Laboratory of Structural Chemistry, Fujian Institute of Research on the Structure of Mater, Chinese Academy of Sciences, Fuzhou, Fujian 350002, P. R. China

<sup>b</sup> Key Laboratory of Coal to Ethylene Glycol and Its Related Technology, Chinese Academy of Sciences, Fuzhou, Fujian 350002, P. R. China

### Experimental section:

#### 1. Materials

Sodium nitrite was purchased from Aladdin Chemistry Co. Ltd.; PbI<sub>2</sub>, benzidine, HI, ethanol, *N,N*-dimethyl formamide (DMF) were received from Sinopharm Chemical Reagent Co. Ltd.. They were directly used without further purification. Water was deionized and distilled before use.

#### 2. Measurements.

The FT-IR spectra were recorded on a PerkinElmer Spectrum One FT-IR spectrometer in 4000–400 cm<sup>-1</sup> region using KBr pellets. The analyses of carbon, nitrogen and hydrogen contents were performed on an Elementar Vario MICRO microanalyser. PXRD pattern was collected on a MiniFlex II diffractometer using Cu-*K<sub>α</sub>* radiation ( $\lambda = 1.540598 \text{ \AA}$ ) at 30 kV and 15 mA. The simulated pattern of **1** was derived from the Mercury Version 1.4 software (<http://www.ccdc.cam.ac.uk/products/mercury/>). The pH was measured by a pHB-5 portable pH meter. Optical absorption spectra were measured on a PerkinElmer Lambda-900 UV/Vis/NIR spectrophotometer. The ESI-MS spectrum was measured by ThermoFinnigan DECA-30000 LCQ Deca XP ion trap mass spectrometry.

#### 3. X-ray crystallographic study

The X-ray diffraction measurement was performed on a Rigaku Ultrax-Saturn 70 diffractometer using graphite monochromated Mo-*K<sub>α</sub>* radiation ( $\lambda = 0.71073 \text{ \AA}$ ). Intensity data

set was collected using an  $\omega$  scan technique and corrected for  $Lp$  effects. The primitive structure was solved by the direct method using the Siemens SHELXTL<sup>TM</sup> Version 5 package of crystallographic software. The difference Fourier maps based on these atomic positions yield the other non-hydrogen atoms. The final structure was refined using a full-matrix least-squares refinement on  $F^2$ . All non-hydrogen atoms were refined anisotropically. The hydrogen atoms on carbon and nitrogen atoms were generated geometrically, while those of water molecules were not included. Crystallographic data have been deposited with the Cambridge Crystallographic Data Centre: CCDC 849193. This datum can be obtained free of charge from The Cambridge Crystallographic Data Center via [www.ccdc.cam.ac.uk/data\\_request/cif](http://www.ccdc.cam.ac.uk/data_request/cif).

#### 4. Synthesis of crystalline (H<sub>2</sub>DAB)(Pb<sub>2</sub>I<sub>6</sub>)·2H<sub>2</sub>O (DAB = benzidine) (1)

A mixture of PbI<sub>2</sub> (0.231 g, 0.25 mmol), DAB (0.046 g, 0.25 mmol), ethanol (1 mL), and concentrated HI (5.0 mL, 45%) was heated at 150 °C for 1.5 days in a sealed 25-mL Teflon-lined stainless steel vessel. Upon cooling at 3 °C·h<sup>-1</sup> to room temperature, light yellow acicular crystals of **1** were obtained in 95% yield (based on PbI<sub>2</sub>). Elem. Anal. (%) Calcd.: C, 10.30; H, 1.29; N, 2.00. Found: C, 10.53; H, 1.34; N, 1.95. IR(KBr, cm<sup>-1</sup>): 3492 (m), 2931 (m), 2595 (w), 1605 (m), 1573 (m), 1493 (s), 1397 (w), 1321 (w), 1203 (w), 1110 (m), 1012 (w), 800 (m), 506 (m).

#### 5. Experimental procedure of sodium nitrite detection using **1**

1 mL DMF solution of **1** (100 μM) was dropped into 4 mL aqueous solution of sodium nitrite with different concentration. The UV-Vis absorption spectra, color and pH values of the obtained solutions were measured (Figures 2,4, 5b).

#### 6. Synthesis of (H<sub>2</sub>DAB)I<sub>2</sub>

2 mL HI (45%) was added dropwise into a solution of DAB (0.092 g) in 25 mL ethanol at room temperature under stirring for 2 h. The pale yellow solid was collected by filtration, washed with water and ethanol, and dried under vacuum at 30 °C in 86% yield (based on DAB). Other correlative compounds H<sub>2</sub>DAB(NO<sub>3</sub>)<sub>2</sub>, H<sub>2</sub>DAB(BA)<sub>2</sub> (BA = benzoic acid), and H<sub>2</sub>DABCl<sub>2</sub> were synthesized using the same method.

## 7. Experimental procedure of sodium nitrite detection using $(\text{H}_2\text{DAB})\text{I}_2$

1 mL DMF solution of  $(\text{H}_2\text{DAB})\text{I}_2$  (100  $\mu\text{M}$ ) was dropped into 4 mL aqueous solution of sodium nitrite with different concentrations. The UV-Vis absorption spectra of obtained solutions were measured. Other correlative compounds  $\text{H}_2\text{DAB}(\text{NO}_3)_2$ ,  $\text{H}_2\text{DAB}(\text{BA})_2$  (BA = benzoic acid), and  $\text{H}_2\text{DABCl}_2$  were tested using the same method (Figure S6).

### Supporting graphics:

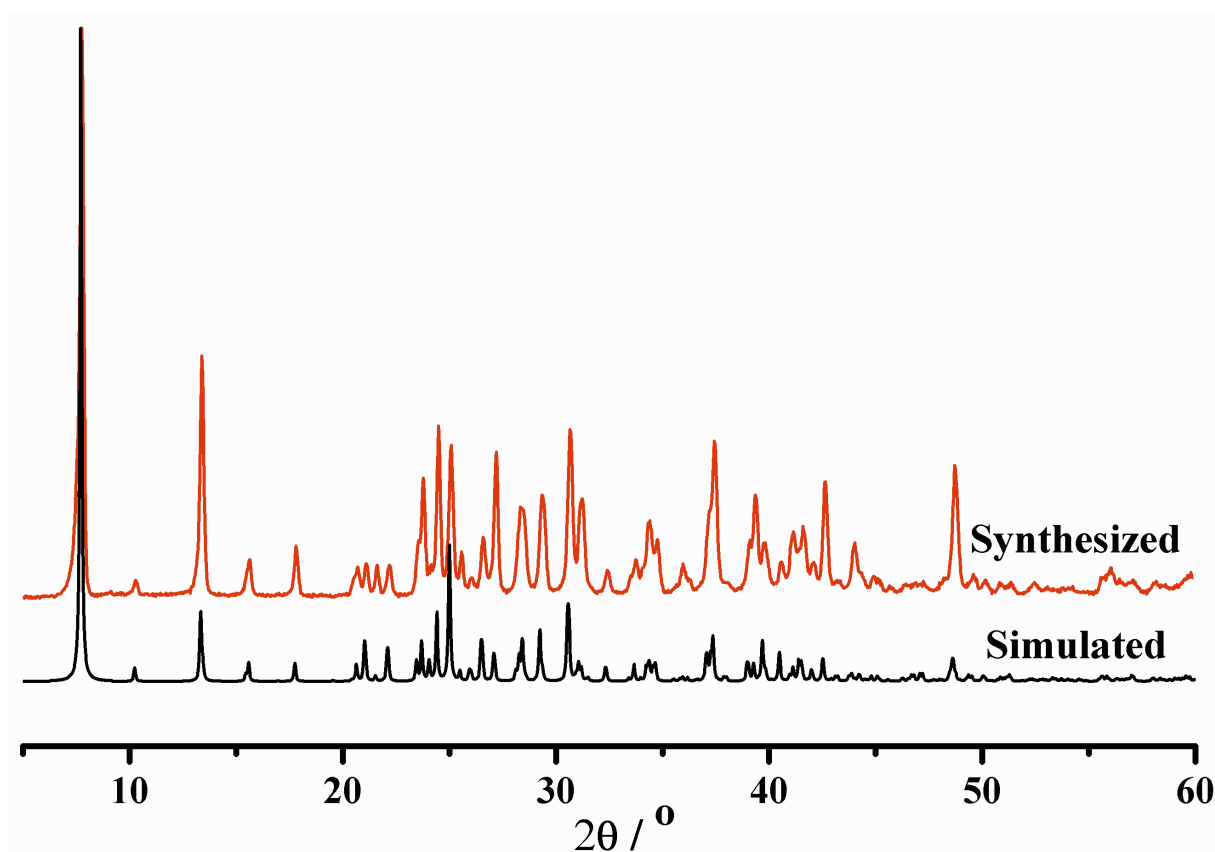

Fig. S1. PXRD patterns of 1.

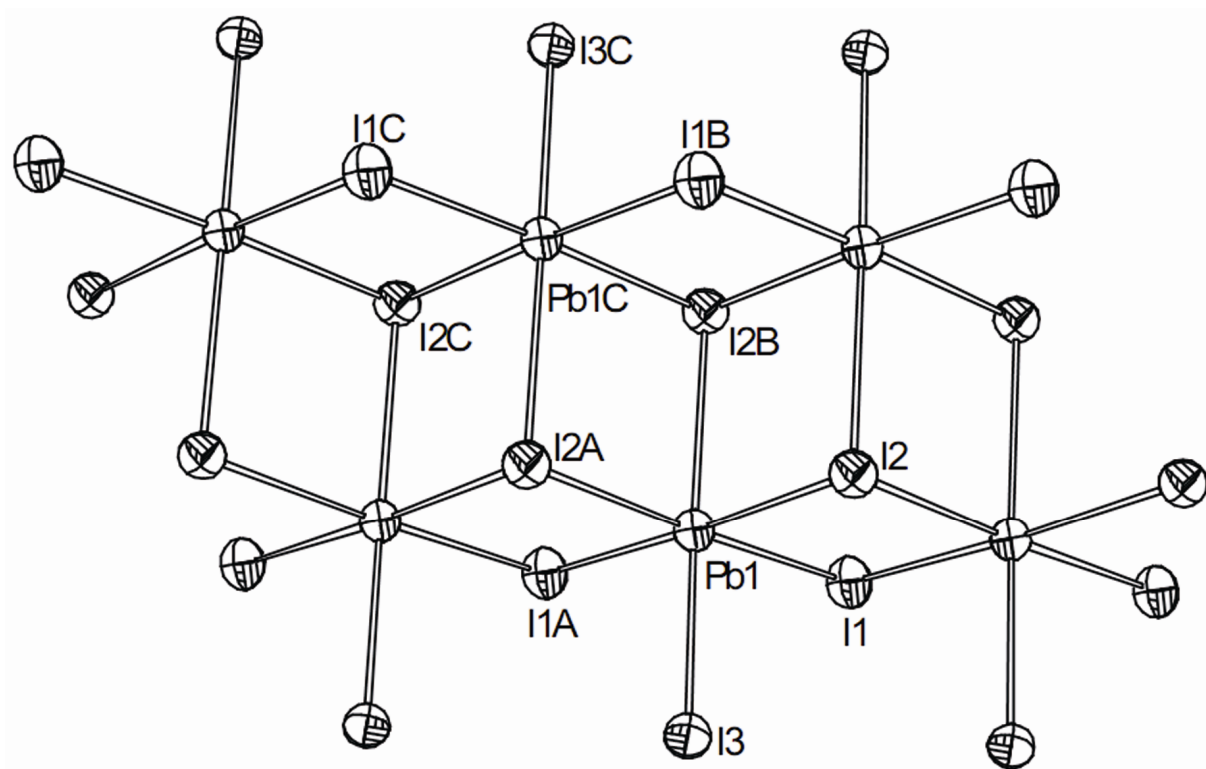

**Fig. S2.** The 1-D chain structure of  $[\text{Pb}_2\text{I}_6]^{2-}$  ion in **1** extending along the  $[1\ 0\ 0]$  direction. Symmetry codes: A =  $-x, -y, -z$ ; B =  $1+x, y, z$ ; C =  $-1-x, -y, -z$ .

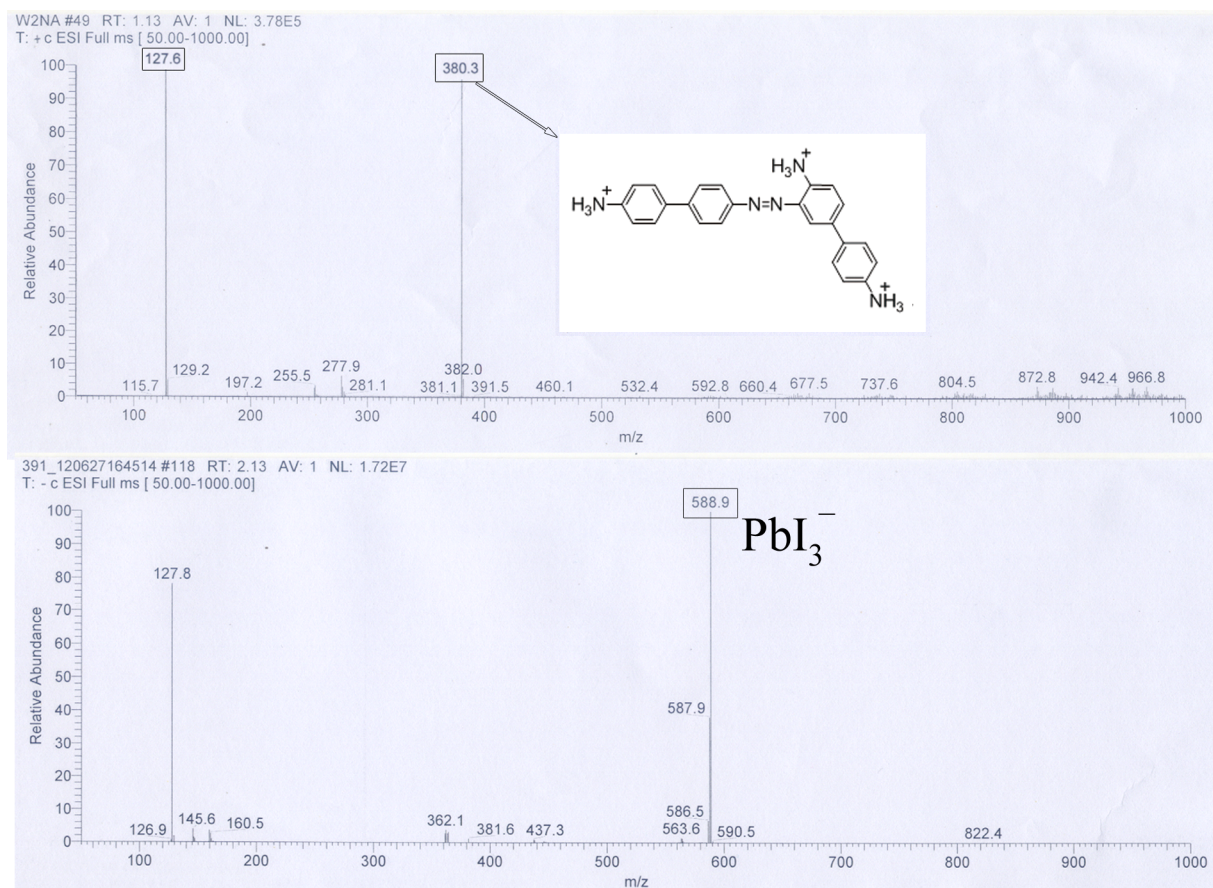

**Fig. S3.** The MS spectrum of diazotization reaction product of protonated benzidine.

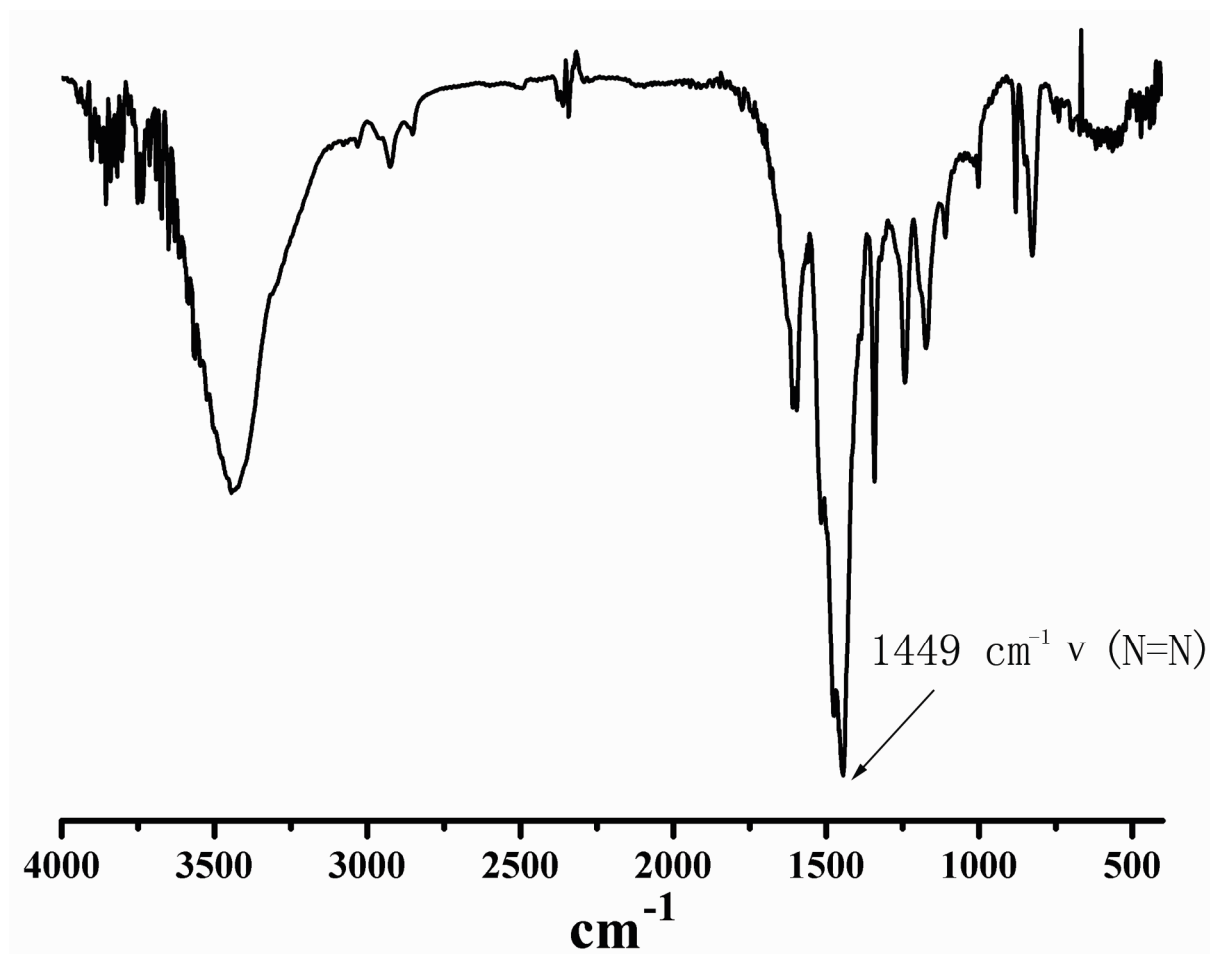

**Fig. S4.** FT-IR spectrum of the azo production.

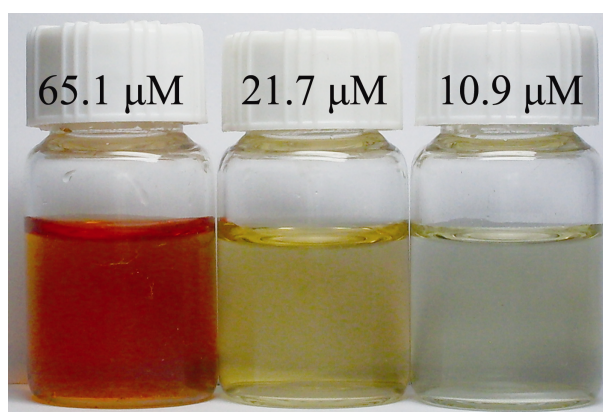

**Fig. S5.** The photographs of reaction solutions, the concentrations of nitrite are 65.1  $\mu\text{M}$  (3 mg/L), 21.7  $\mu\text{M}$  (1 mg/L), and 10.9  $\mu\text{M}$  (0.5 mg/L).

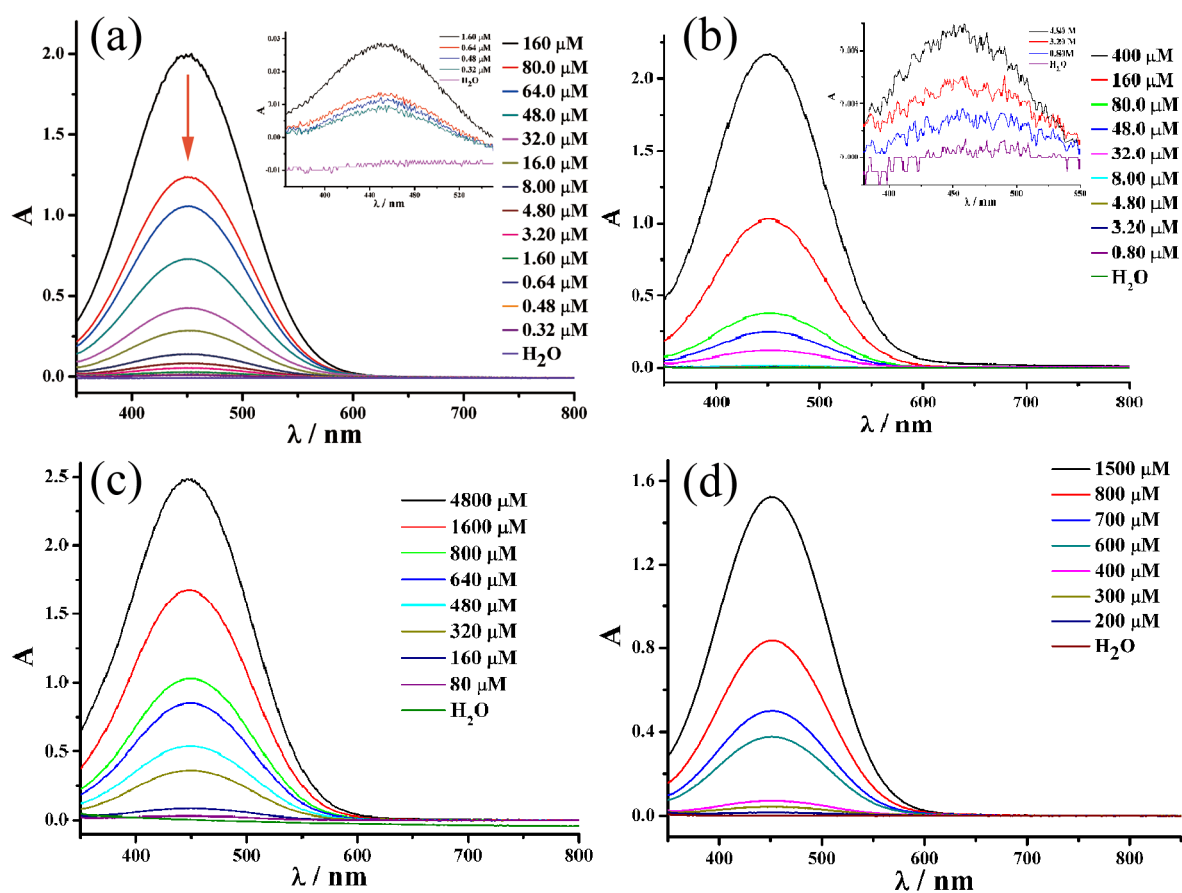

**Fig. S6.** UV spectroscopic studies for nitrite sensing upon the same concentration (100  $\mu$ M) of (H<sub>2</sub>DAB)I<sub>2</sub> (a), H<sub>2</sub>DAB(NO<sub>3</sub>)<sub>2</sub> (b), H<sub>2</sub>DAB(BA)<sub>2</sub> (BA = benzoic acid) (c), and H<sub>2</sub>DABCl<sub>2</sub> (d) and different concentration of nitrite.
